# Supplementary material
Source: publisher site journal article supplement (https://www.spandidos-publications.com/6283/downloadSupplementary)
Supplement: Supplementary file 1 [file downloadSupplementary]

## Sheet: Sheet1
Table SVIII. Univariate analysis of factors associated with overall survival time.
	Univariate analysis
	p-value	Hazard Ratio	95% confidence intervel
Age	0.225	0.613	0.277-1.353
AFP	0.25	2.538	1.121-5.744
Pathologic differentiation	0.03	2.446	1.092-5.477
Number of lesions	0.001	5.52	2.050-14.864
Tumor sizes	0.012	3.066	1.278-7.355
Location	0.557	0.782	0.344-1.776
Completion of Capsula	0.039	3.568	1.064-11.963
Positive margin	0.033	2.947	1.091-7.957
TNM stage	0.00038	4.669	1.995-10.922
PVTT	0.007	3.543	1.410-8.902
Lymph node Metastasis	0.034	3.748	1.105-12.715
RPL9 Elisa results	0.021	2.542	1.154-5.600
Hazard ratio and P values were calculated using univariate Cox proportional hazards regression.
